# Supplementary material for: Combined Effects of Chronic Kidney Disease and Nonalcoholic Fatty Liver Disease on the Risk of Cardiovascular Disease in Patients with Diabetes
Source: MDPI journal article supplement (doi:10.3390/biomedicines10061245), 2022-05-26
Supplement: s1 [file s1]

**Supplementary Table S1. Risk of cardiovascular event according to CKD and NAFLD.**

|                                 | Number<br>of event | Incidence rate<br>(1,000 p-y) | Model 1              | Model 2          | Model 3          | Model 4          |
|---------------------------------|--------------------|-------------------------------|----------------------|------------------|------------------|------------------|
|                                 |                    |                               | Adjusted HR (95% CI) |                  |                  |                  |
| <b>Myocardial Infarction</b>    |                    |                               |                      |                  |                  |                  |
| No CKD/No NAFLD                 | 24,759             | 3.35                          | 1 (reference)        | 1 (reference)    | 1 (reference)    | 1 (reference)    |
| No CKD/NAFLD                    | 8,617              | 3.28                          | 1.18 (1.15–1.21)     | 1.16 (1.13–1.19) | 1.21 (1.18–1.25) | 1.19 (1.16–1.23) |
| CKD/No NAFLD                    | 5,752              | 6.85                          | 1.45 (1.40–1.49)     | 1.33 (1.29–1.37) | 1.33 (1.30–1.37) | 1.33 (1.29–1.37) |
| CKD/NAFLD                       | 1,735              | 6.68                          | 1.56 (1.49–1.64)     | 1.43 (1.36–1.50) | 1.49 (1.42–1.57) | 1.47 (1.40–1.55) |
| <b>Stroke</b>                   |                    |                               |                      |                  |                  |                  |
| No CKD/No NAFLD                 | 36,027             | 4.90                          | 1 (reference)        | 1 (reference)    | 1 (reference)    | 1 (reference)    |
| No CKD/NAFLD                    | 11,468             | 4.39                          | 1.18 (1.15–1.20)     | 1.14 (1.11–1.16) | 1.21 (1.18–1.24) | 1.19 (1.16–1.22) |
| CKD/No NAFLD                    | 8,340              | 10.04                         | 1.28 (1.25–1.31)     | 1.19 (1.16–1.22) | 1.19 (1.16–1.22) | 1.18 (1.15–1.21) |
| CKD/NAFLD                       | 2,592              | 10.10                         | 1.51 (1.45–1.57)     | 1.37 (1.32–1.43) | 1.48 (1.41–1.54) | 1.45 (1.39–1.52) |
| <b>Overall mortality</b>        |                    |                               |                      |                  |                  |                  |
| No CKD/No NAFLD                 | 70,966             | 9.51                          | 1 (reference)        | 1 (reference)    | 1 (reference)    | 1 (reference)    |
| No CKD/NAFLD                    | 19,468             | 7.35                          | 1.09 (1.07–1.11)     | 1.10 (1.08–1.11) | 1.54 (1.52–1.57) | 1.46 (1.44–1.48) |
| CKD/No NAFLD                    | 21,250             | 24.90                         | 1.46 (1.44–1.48)     | 1.39 (1.37–1.42) | 1.41 (1.39–1.43) | 1.35 (1.34–1.37) |
| CKD/NAFLD                       | 5,293              | 20.04                         | 1.41 (1.37–1.45)     | 1.37 (1.33–1.40) | 2.00 (1.94–2.06) | 1.79 (1.74–1.83) |
| <b>Cardiovascular mortality</b> |                    |                               |                      |                  |                  |                  |

|                 |        |      |                  |                  |                  |                  |
|-----------------|--------|------|------------------|------------------|------------------|------------------|
| No CKD/No NAFLD | 12,490 | 1.67 | 1 (reference)    | 1 (reference)    | 1 (reference)    | 1 (reference)    |
| No CKD/NAFLD    | 3,349  | 1.26 | 1.14 (1.10–1.19) | 1.09 (1.05–1.14) | 1.47 (1.41–1.54) | 1.37 (1.47–1.43) |
| CKD/No NAFLD    | 4,659  | 5.46 | 1.67 (1.62–1.73) | 1.55 (1.50–1.61) | 1.57 (1.51–1.62) | 1.52 (1.47–1.43) |
| CKD/NAFLD       | 1,190  | 4.50 | 1.75 (1.65–1.85) | 1.58 (1.49–1.68) | 2.20 (2.07–2.35) | 2.00 (1.88–2.12) |

Abbreviations: p-y, person-year; CKD, chronic kidney disease; NAFLD, nonalcoholic fatty liver disease; HR, hazard ratio; CI, confidence interval

Model 1: Adjusted for age and sex

Model 2: Adjusted for age, sex, income, smoking, alcohol consumption, regular exercise, hypertension, dyslipidemia, glucose, diabetes duration, insulin use and three or more oral hypoglycemic agents

Model 3: Model 2 plus adjusted for body mass index

Model 4: Model 3 plus adjusted for statin use

**Supplementary Table S2. Risk of cardiovascular event according to CKD (defined by CKD-EPI equation) and NAFLD.**

|                                 | Number<br>of event | Incidence rate<br>(1,000 p-y) | Model 1              | Model 2          | Model 3          | Model 4          |
|---------------------------------|--------------------|-------------------------------|----------------------|------------------|------------------|------------------|
|                                 |                    |                               | Adjusted HR (95% CI) |                  |                  |                  |
| <b>Myocardial Infarction</b>    |                    |                               |                      |                  |                  |                  |
| No CKD/No NAFLD                 | 24,759             | 3.35                          | 1 (reference)        | 1 (reference)    | 1 (reference)    | 1 (reference)    |
| No CKD/NAFLD                    | 8,617              | 3.28                          | 1.18 (1.15–1.21)     | 1.16 (1.13–1.19) | 1.21 (1.18–1.25) | 1.20 (1.16–1.23) |
| CKD/No NAFLD                    | 5,752              | 6.85                          | 1.41 (1.15–1.21)     | 1.31 (1.27–1.35) | 1.31 (1.27–1.35) | 1.31 (1.27–1.34) |
| CKD/NAFLD                       | 1,735              | 6.68                          | 1.52 (1.45–1.60)     | 1.40 (1.34–1.47) | 1.46 (1.39–1.54) | 1.45 (1.38–1.52) |
| <b>Stroke</b>                   |                    |                               |                      |                  |                  |                  |
| No CKD/No NAFLD                 | 36,027             | 4.90                          | 1 (reference)        | 1 (reference)    | 1 (reference)    | 1 (reference)    |
| No CKD/NAFLD                    | 11,468             | 4.39                          | 1.17 (1.15–1.20)     | 1.13 (1.11–1.16) | 1.21 (1.18–1.24) | 1.19 (1.17–1.32) |
| CKD/No NAFLD                    | 8,340              | 10.04                         | 1.24 (1.21–1.27)     | 1.15 (1.13–1.18) | 1.16 (1.13–1.18) | 1.15 (1.12–1.18) |
| CKD/NAFLD                       | 2,592              | 10.10                         | 1.48 (1.42–1.54)     | 1.35 (1.30-1.40) | 1.45 (1.39–1.51) | 1.43 (1.37-1.49) |
| <b>Overall mortality</b>        |                    |                               |                      |                  |                  |                  |
| No CKD/No NAFLD                 | 70,966             | 9.51                          | 1 (reference)        | 1 (reference)    | 1 (reference)    | 1 (reference)    |
| No CKD/NAFLD                    | 19,468             | 7.35                          | 1.09 (1.07–1.10)     | 1.10 (1.08–1.12) | 1.55 (1.52–1.58) | 1.54 (1.51–1.57) |
| CKD/No NAFLD                    | 21,250             | 24.90                         | 1.43 (1.41–1.45)     | 1.37 (1.35–1.40) | 1.39 (1.37–1.41) | 1.38 (1.36–1.41) |
| CKD/NAFLD                       | 5,293              | 20.04                         | 1.39 (1.35–1.43)     | 1.35 (1.31–1.38) | 1.97 (1.91–2.03) | 1.95 (1.90–2.01) |
| <b>Cardiovascular mortality</b> |                    |                               |                      |                  |                  |                  |

|                 |        |      |                  |                  |                  |                  |
|-----------------|--------|------|------------------|------------------|------------------|------------------|
| No CKD/No NAFLD | 12,490 | 1.67 | 1 (reference)    | 1 (reference)    | 1 (reference)    | 1 (reference)    |
| No CKD/NAFLD    | 3,349  | 1.26 | 1.15 (1.11–1.20) | 1.10 (1.06–1.15) | 1.48 (1.42–1.55) | 1.46 (1.40–1.53) |
| CKD/No NAFLD    | 4,659  | 5.46 | 1.65 (1.59–1.70) | 1.54 (1.49–1.59) | 1.55 (1.50–1.60) | 1.54 (1.49–1.60) |
| CKD/NAFLD       | 1,190  | 4.50 | 1.70 (1.61–1.80) | 1.54 (1.46–1.64) | 2.15 (2.02–2.29) | 2.12 (1.99–2.26) |

Abbreviations: p-y, person-year; CKD, chronic kidney disease; NAFLD, nonalcoholic fatty liver disease; CKD-EPI, Chronic Kidney Disease Epidemiology Collaboration; HR, hazard ratio; CI, confidence interval

Model 1: Adjusted for age and sex

Model 2: Adjusted for age, sex, income, smoking, alcohol consumption, regular exercise, hypertension, dyslipidemia, glucose, diabetes duration, insulin use and three or more oral hypoglycemic agents

Model 3: Model 2 plus adjusted for body mass index

Model 4: Model 3 plus adjusted for statin use
